# Supplementary material
Source: HighWire-hosted journal article supplement (https://rspb.royalsocietypublishing.org/content/suppl/2009/03/13/274.1626.2653)
Supplement: rspb20070852supp1.doc [file rspb20070852supp1.doc]

**Electronic supplementary material #1**

**Survey of sequence variation in mtDNA coding regions**

Sequencing of two different coding regions (fragments of the cytochrome *c* oxidase I and cytochrome *b* genes) yielded no variation across a subset of dark-eyed and yellow-eyed individuals. The two coding regions included a 610 base pair fragment of the cytochrome *c* oxidase I (COI) gene obtained using primers “BirdF1” and “BirdR1” (Hebert 2004), and 327 base pairs of the cytochrome *b* gene using primers MVZ03’ and MVZ04’ (modified by C. Cicero from (Kocher et al. 1989)). Individuals from the following locations were surveyed: Alaska (*J. hyemalis*) n=10; California (*J. oreganus*) n=12; Durango (*J. phaeonotus palliatus*) n=10; Oaxaca (*J. ph. phaeonotus*) n=8. Sequences were unambiguously translated into their amino acid sequence and aligned with sequenes in GenBank using BLAST. Our cyt *b* haplotype was identical to GenBank accession AF290161, and our COI haplotype was identical to GenBank accession DQ434619.

**References cited:**

Hebert, P. D. N. 2004 Identification of birds through DNA barcodes. *PLOS Biology* 2, 1657-1663.

Kocher, T. D., Thomas, W. K., Meyer, A., Edwards, S. V., Pääbo, S., Villablanca, F. X. & Wilson, A. C. 1989 Dynamics of mitochondrial DNA evolution in animals: amplification and sequencing with conserved primers. *Proceedings of the National Academy of Sciences USA* 86, 6196-6200.
